# Supplementary material for: Scale-up synthesis of high-quality solid-state-processed CsCuX (X = Cl, Br, I) perovskite nanocrystal materials toward near-ultraviolet flexible electronic properties
Source: Royal Society of Chemistry journal article supplement (doi:10.1039/d2ra07100b), 2023-01-01
Supplement: d2ra07100b1.pdf [file d2ra07100b1.pdf]

## Solid-State Synthesis of Lead-Free Perovskite Materials Toward Near-Ultraviolet Flexible Electronics

Zhi Jiang,<sup>a,b</sup> Hezhuang Liu,<sup>b</sup> Jihua Zou,<sup>b</sup> Yixuan Huang,<sup>b</sup> Zhaoquan Xu,<sup>b</sup> Denys Pustovyj<sup>a</sup> and Svetlana Vitusevich<sup>a</sup>

<sup>a</sup>Institute of Biological Information Processing (IBI-3), Forschungszentrum Jülich, Juelich 52425, Germany

<sup>b</sup>Institute of Fundamental and Frontier Sciences, University of Electronic Science and Technology of China, Chengdu 610054, China

✉Authors to whom correspondence should be addressed: Jiang, Zhi [z.jiang@fz-juelich.de](mailto:z.jiang@fz-juelich.de), Svetlana Vitusevich [s.vitusevich@fz-juelich.de](mailto:s.vitusevich@fz-juelich.de)

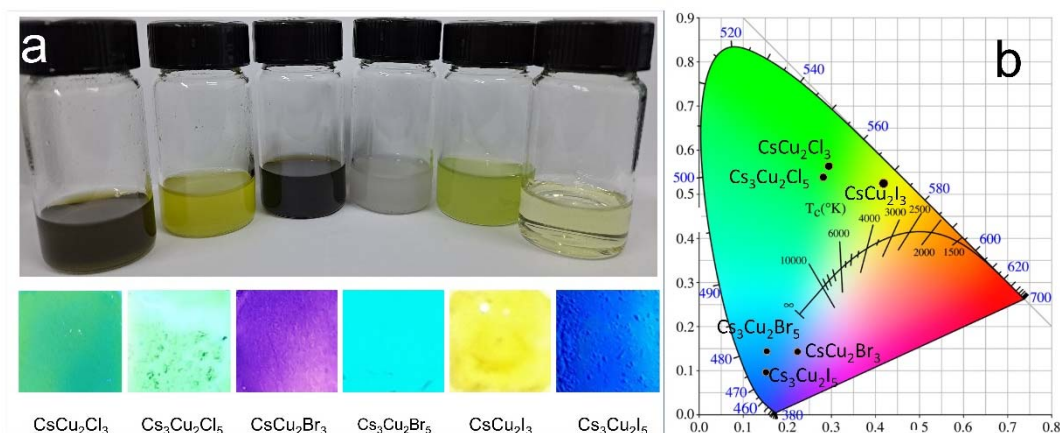

Figure S1. (a) The digital images of CsCu<sub>2</sub>Cl<sub>3</sub>, Cs<sub>3</sub>Cu<sub>2</sub>Cl<sub>5</sub>, CsCu<sub>2</sub>Br<sub>3</sub>, Cs<sub>3</sub>Cu<sub>2</sub>Br<sub>5</sub>, CsCu<sub>2</sub>I<sub>3</sub> and Cs<sub>3</sub>Cu<sub>2</sub>I<sub>5</sub> dissolved into DMF. Insets (below the images) demonstrate the corresponding PL emission on paper substrate. (b) CIE 1931 chromaticity plot of the six lead-free halides perovskite.

Table S1. Photophysical properties of Cs<sub>3</sub>Cu<sub>2</sub>X<sub>5</sub> perovskite, exposed to Air for 60 days

| Materials                                       | $\lambda_{\text{ex}}$ (nm) | $\lambda_{\text{em}}$ (nm) | CIE              | lifetime ( $\mu\text{s}$ ) | PLQY(%) |
|-------------------------------------------------|----------------------------|----------------------------|------------------|----------------------------|---------|
| CsCu <sub>2</sub> Cl <sub>3</sub>               | 308                        | 530                        | (0.2938, 0.5643) | 111.065                    | 3.69    |
| Cs <sub>3</sub> Cu <sub>2</sub> Cl <sub>5</sub> | 312                        | 495                        | (0.2813, 0.5424) | 109.815                    | 4.26    |
| CsCu <sub>2</sub> Br <sub>3</sub>               | 315                        | 435                        | (0.1814, 0.1542) | 5.433                      | 9.56    |
| Cs <sub>3</sub> Cu <sub>2</sub> Br <sub>5</sub> | 310                        | 460                        | (0.155, 0.1415)  | 20.668                     | 20.22   |
| CsCu <sub>2</sub> I <sub>3</sub>                | 334                        | 560                        | (0.4156, 0.5267) | 0.631                      | 22.81   |
| Cs <sub>3</sub> Cu <sub>2</sub> I <sub>5</sub>  | 320                        | 445                        | (0.1513, 0.0978) | 1.002                      | 95.20   |

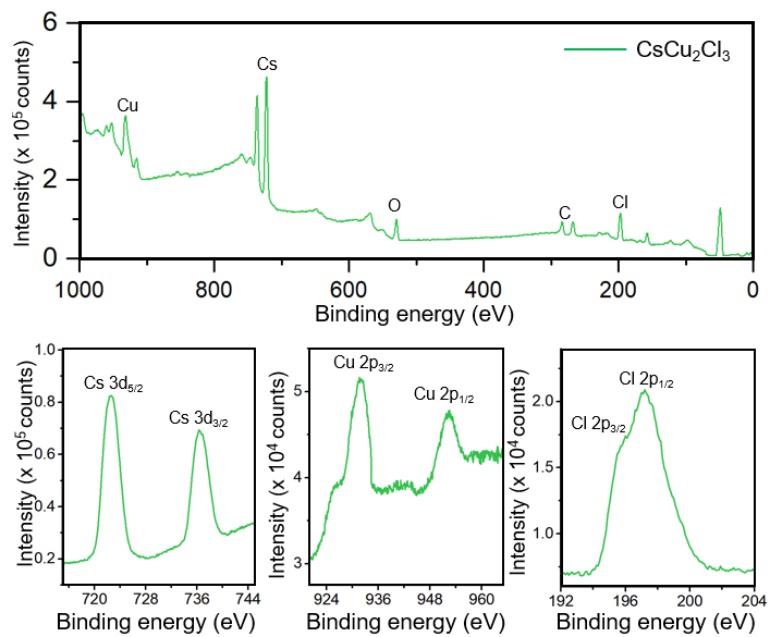

Figure S2. XPS spectra of  $\text{CsCu}_2\text{Cl}_3$  powders.

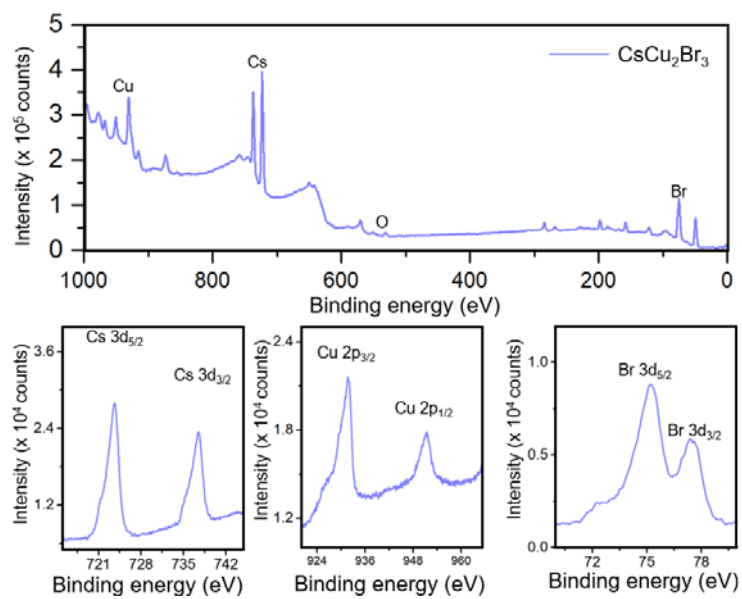

Figure S3. XPS spectra of  $\text{CsCu}_2\text{Br}_3$  powders.

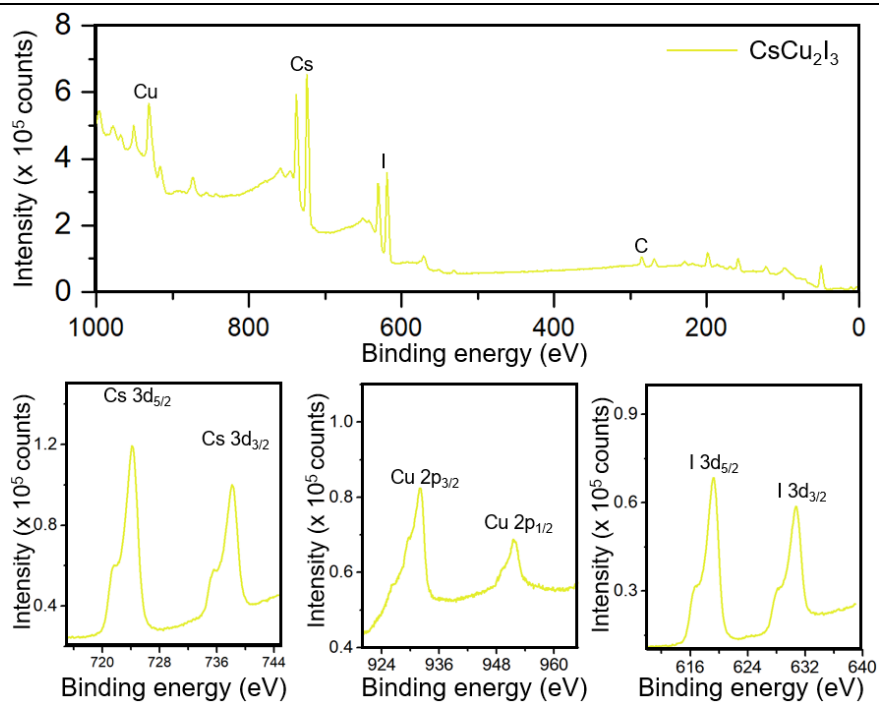

Figure S4. XPS spectra of  $\text{CsCu}_2\text{I}_3$  powders.

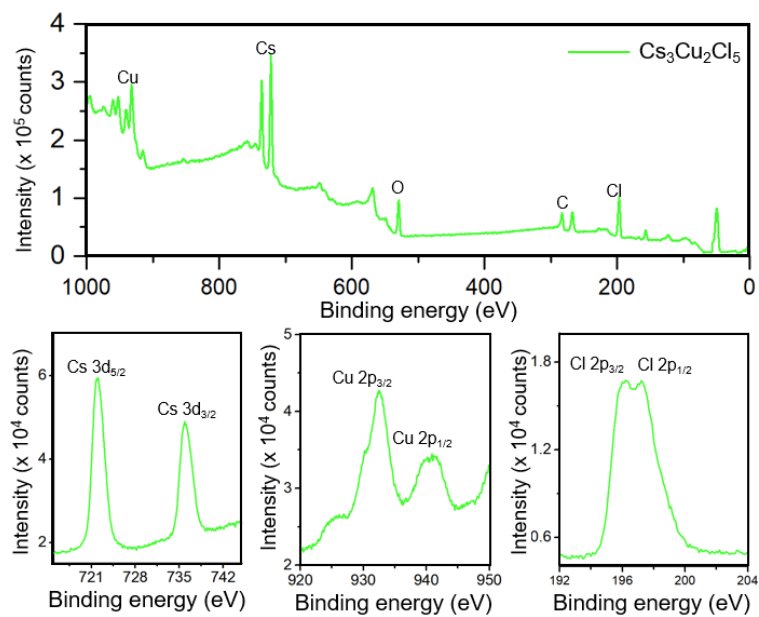

Figure S5. XPS spectra of  $\text{Cs}_3\text{Cu}_2\text{Cl}_5$  powders.

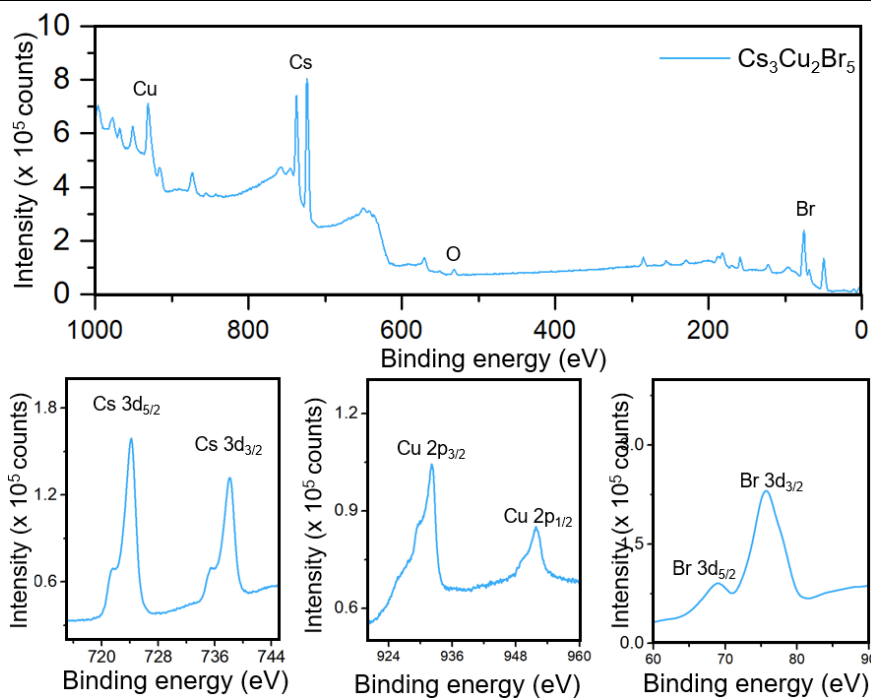

Figure S6. XPS spectra of  $\text{Cs}_3\text{Cu}_2\text{Br}_5$  powders.

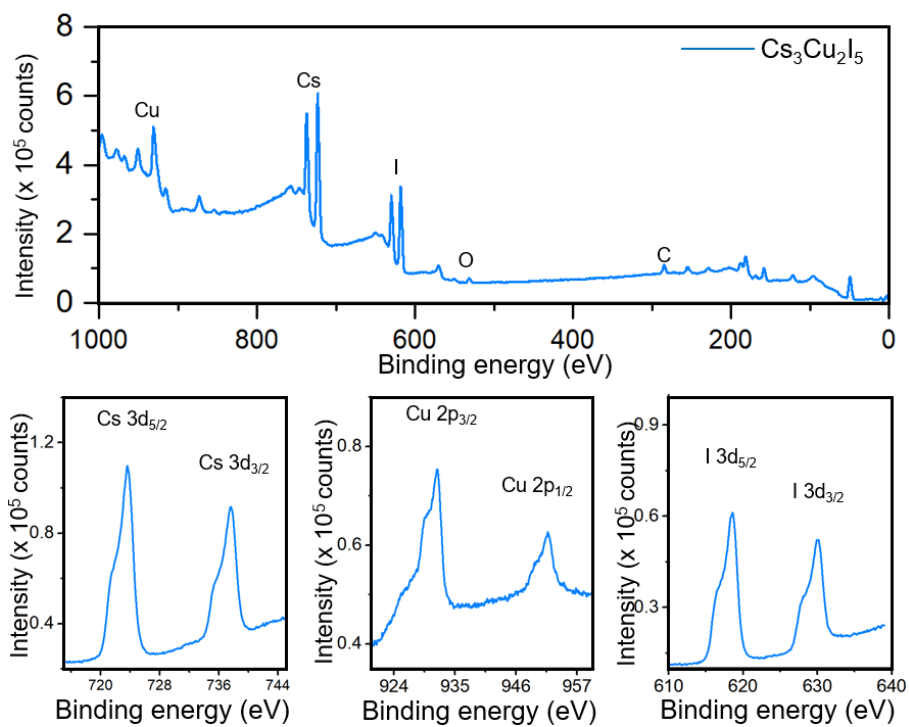

Figure S7. XPS spectra of  $\text{Cs}_3\text{Cu}_2\text{I}_5$  powders.

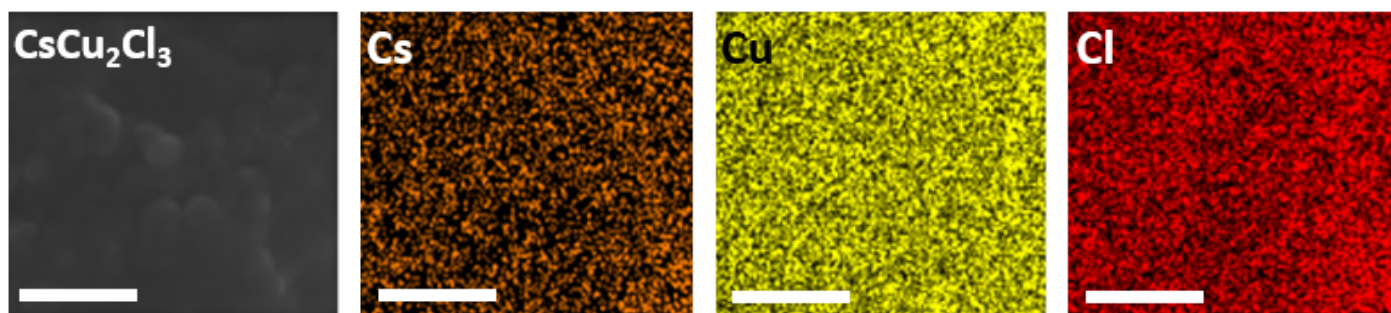

| Element       | Line Type | Apparent Concentration | k Ratio | Wt%    | Wt% Sigma | Atomic % |
|---------------|-----------|------------------------|---------|--------|-----------|----------|
| Cl            | L series  | 15.97                  | 0.12875 | 31.56  | 0.34      | 48.42    |
| Cu            | L series  | 14.73                  | 0.14967 | 33.86  | 0.52      | 35.85    |
| Cs            | L series  | 12.18                  | 0.12177 | 34.58  | 0.68      | 15.73    |
| <b>Total:</b> |           |                        |         | 100.00 |           | 100.00   |

Figure S8. SEM images (top) of  $\text{CsCu}_2\text{Cl}_3$  thin film on paper, the scale bar is 500 nm. The colors reflect different material content in pvs. The element EDS results summarized also in the Table below obtained for the corresponding perovskite films on paper.

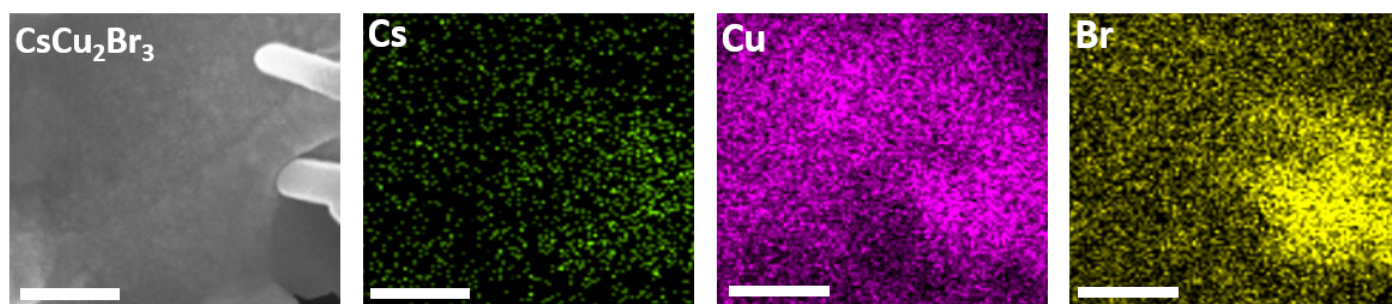

| Element       | Line Type | Apparent Concentration | k Ratio | Wt%    | Wt% Sigma | Atomic % |
|---------------|-----------|------------------------|---------|--------|-----------|----------|
| Br            | L series  | 38.51                  | 0.38514 | 43.37  | 0.58      | 53.91    |
| Cu            | L series  | 22.42                  | 0.20073 | 13.52  | 0.49      | 30.05    |
| Cs            | L series  | 26.58                  | 0.05010 | 43.11  | 0.75      | 16.04    |
| <b>Total:</b> |           |                        |         | 100.00 |           | 100.00   |

Figure S9. SEM image (top on the left) of  $\text{CsCu}_2\text{Br}_3$  thin film on paper, the scale bar is 500 nm. The element EDS results of the corresponding perovskite films on paper.



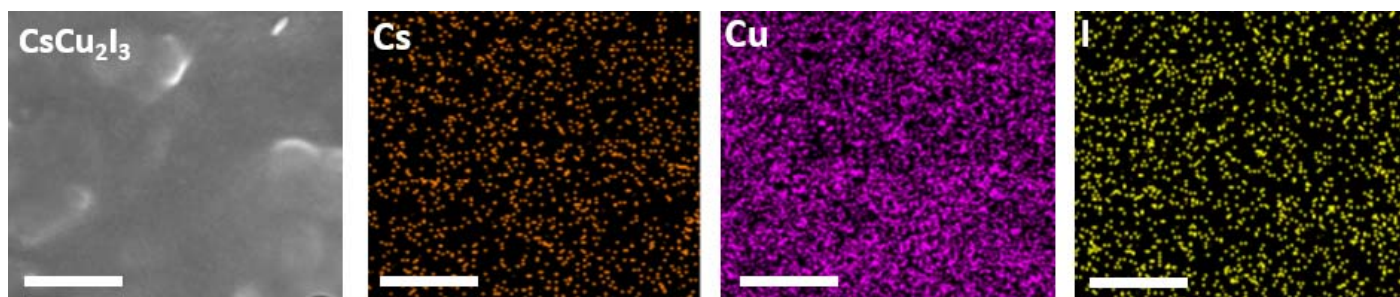

| Element       | Line Type | Apparent Concentration | k Ratio | Wt%    | Wt% Sigma | Atomic % |
|---------------|-----------|------------------------|---------|--------|-----------|----------|
| I             | L series  | 12.63                  | 0.08075 | 59.58  | 1.42      | 35.66    |
| Cu            | L series  | 4.07                   | 0.16631 | 19.91  | 1.82      | 50.78    |
| Cs            | L series  | 4.97                   | 0.02969 | 20.51  | 1.94      | 13.56    |
| <b>Total:</b> |           |                        |         | 100.00 |           | 100.00   |

Figure S10. SEM image (top on the left) of  $\text{CsCu}_2\text{I}_3$  thin film on paper, the scale bar is 500 nm. The element EDS results summarized also in the Table below obtained for the corresponding perovskite films on paper.

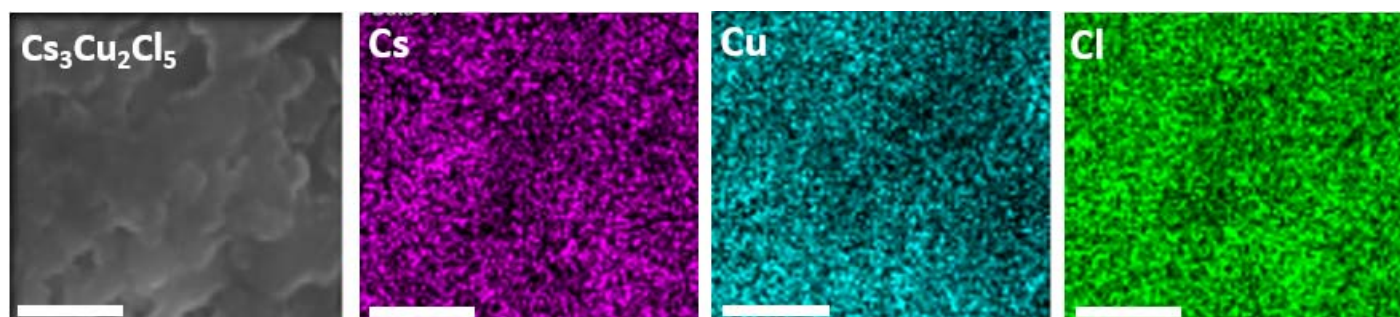

| Element       | Line Type | Apparent Concentration | k Ratio | Wt%    | Wt% Sigma | Atomic % |
|---------------|-----------|------------------------|---------|--------|-----------|----------|
| Cl            | K series  | 40.81                  | 0.35665 | 23.87  | 0.26      | 46.91    |
| Cu            | L series  | 19.27                  | 0.19271 | 23.00  | 0.31      | 25.23    |
| Cs            | L series  | 63.39                  | 0.63392 | 53.13  | 0.43      | 27.86    |
| <b>Total:</b> |           |                        |         | 100.00 |           | 100.00   |

Figure S11. SEM image (top on the left) of  $\text{Cs}_3\text{Cu}_2\text{Cl}_5$  thin film on paper, the scale bar is 500 nm. The element EDS results summarized also in the Table below obtained for the corresponding perovskite films on paper.

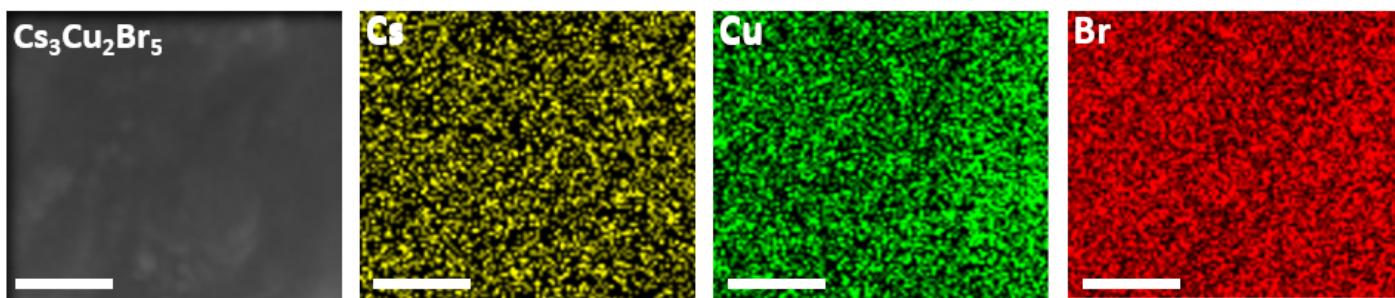

| Element       | Line Type | Apparent Concentration | k Ratio | Wt%    | Wt% Sigma | Atomic % |
|---------------|-----------|------------------------|---------|--------|-----------|----------|
| Br            | L series  | 58.98                  | 0.52817 | 42.67  | 0.51      | 49.38    |
| Cu            | L series  | 15.29                  | 0.15294 | 14.12  | 0.32      | 20.56    |
| Cs            | L series  | 63.50                  | 0.63501 | 43.20  | 0.59      | 30.06    |
| <b>Total:</b> |           |                        |         | 100.00 |           | 100.00   |

Figure S12. SEM image (top on the left) of  $\text{Cs}_3\text{Cu}_2\text{Br}_5$  thin film on paper, the scale bar is 500 nm. The element EDS results summarized also in the Table below obtained for the corresponding perovskite films on paper.

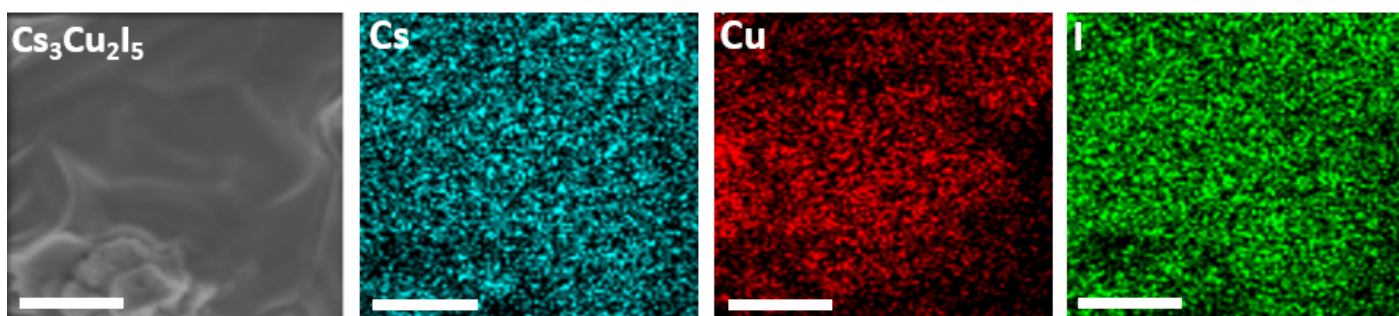

| Element       | Line Type | Apparent Concentration | k Ratio | Wt%    | Wt% Sigma | Atomic % |
|---------------|-----------|------------------------|---------|--------|-----------|----------|
| I             | L series  | 94.23                  | 0.94229 | 54.20  | 0.60      | 48.97    |
| Cu            | L series  | 10.94                  | 0.10938 | 12.24  | 0.31      | 22.09    |
| Cs            | L series  | 57.83                  | 0.57827 | 33.55  | 0.63      | 28.94    |
| <b>Total:</b> |           |                        |         | 100.00 |           | 100.00   |

Figure S13. SEM image (top on the left) of  $\text{Cs}_3\text{Cu}_2\text{I}_5$  thin film on paper, the scale bar is 500 nm. The element EDS results summarized also in the Table below obtained for the corresponding perovskite films on paper.

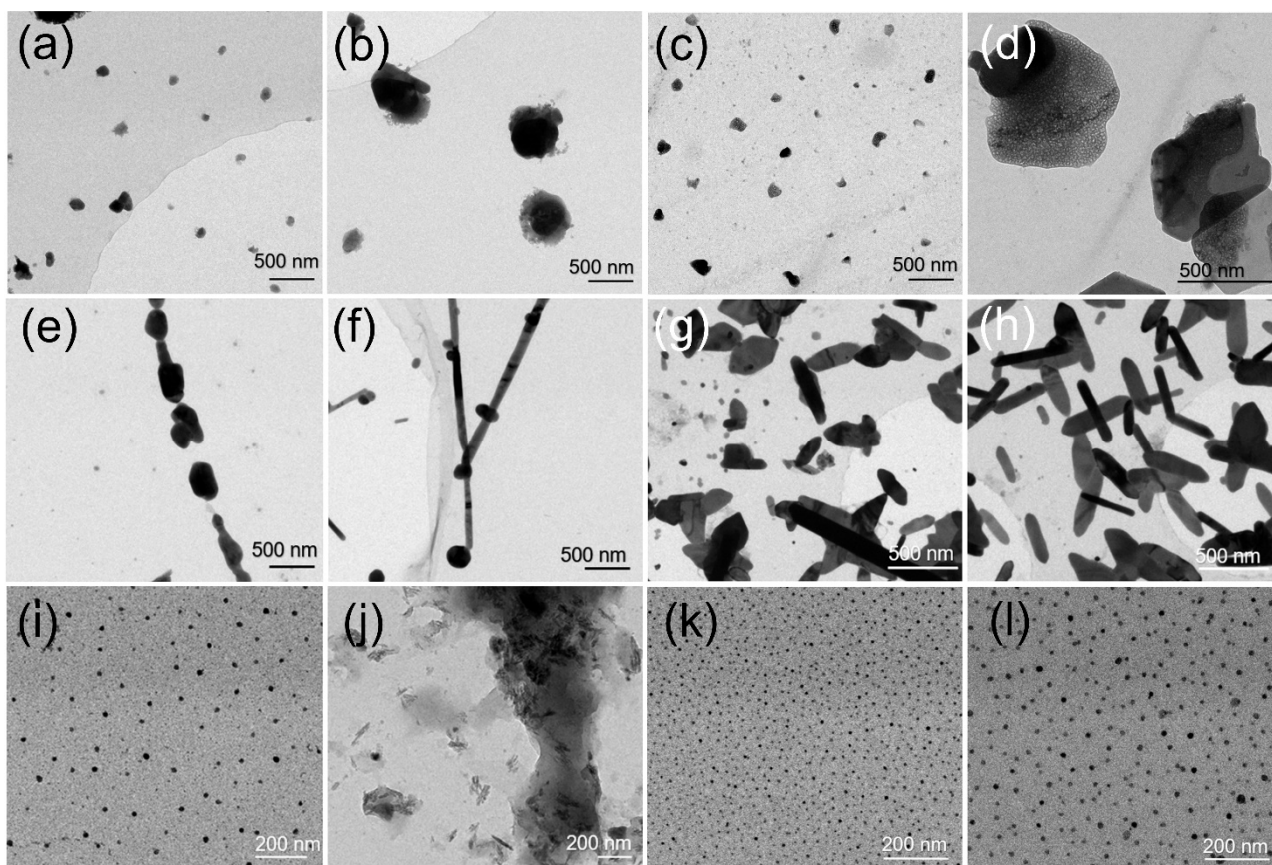

Figure S14. Morphology and shape evolution of the as-prepared  $\text{CsCu}_2\text{X}_3$  and  $\text{Cs}_3\text{Cu}_2\text{X}_5$  NCs synthesized with different reaction time. 2h and 4h; (a) and (b) for  $\text{CsCu}_2\text{Cl}_3$ , (c) and (d) for  $\text{Cs}_3\text{Cu}_2\text{Cl}_5$ , (e) and (f) for  $\text{CsCu}_2\text{Br}_3$ , (g) and (h) for  $\text{Cs}_3\text{Cu}_2\text{Br}_5$ , (i) and (j) for  $\text{CsCu}_2\text{I}_3$ , (k) and (l) for  $\text{Cs}_3\text{Cu}_2\text{I}_5$ , respectively

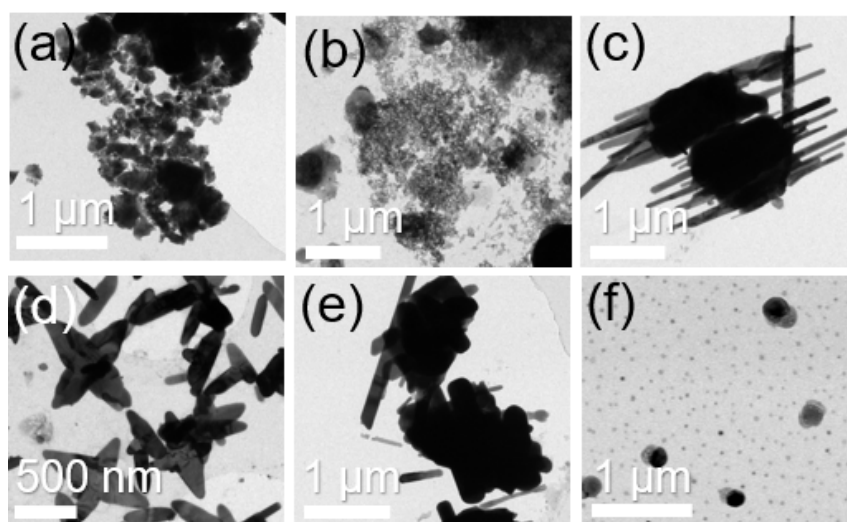

Figure S15. TEM images of (a)  $\text{CsCu}_2\text{Cl}_3$  (b)  $\text{Cs}_3\text{Cu}_2\text{Cl}_5$  (c)  $\text{CsCu}_2\text{Br}_3$  (d)  $\text{Cs}_3\text{Cu}_2\text{Br}_5$  (e)  $\text{CsCu}_2\text{I}_3$  (f)  $\text{Cs}_3\text{Cu}_2\text{I}_5$  obtained for the case of 6h reaction time.



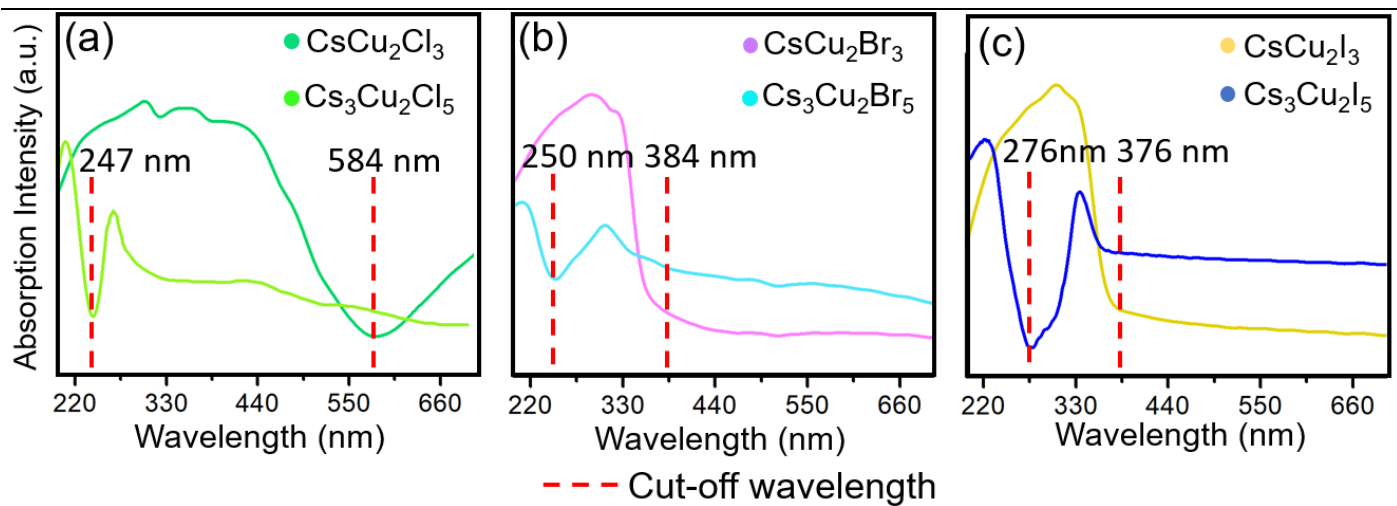

Figure S16. UV/Vis absorption spectra of (a)  $\text{CsCu}_2\text{Cl}_3$  and  $\text{Cs}_3\text{Cu}_2\text{Cl}_5$ , (b)  $\text{CsCu}_2\text{Br}_3$  and  $\text{Cs}_3\text{Cu}_2\text{Br}_5$ , (c)  $\text{CsCu}_2\text{I}_3$  and  $\text{Cs}_3\text{Cu}_2\text{I}_5$  crystals.
